# Supplementary material for: Enzymatic bypass of an N6-deoxyadenosine DNA–ethylene dibromide–peptide cross-link by translesion DNA polymerases
Source: PubMed Central journal article supplement (PMC8024977; doi:10.1016/j.jbc.2021.100444), 2021-02-20
Supplement: mmc1.pdf [file mmc1.pdf]

## SUPPORTING INFORMATION

### **Enzymatic bypass of an *N*<sup>6</sup>-deoxyadenosine DNA-ethylene dibromide-peptide crosslink by translesion DNA polymerases**

Pratibha P. Ghodke,<sup>1</sup> Gabriela Gonzalez Vasquez,<sup>1</sup> Hui Wang, Kevin M. Johnson, Carl A.  
Sedgeman, and F. Peter Guengerich\*

Department of Biochemistry, Vanderbilt University School of Medicine, Nashville, Tennessee

37232-0146

E-mail: f.guengerich@vanderbilt.edu

<sup>1</sup>These authors contributed equally to this work and should be considered co-first authors.

## Contents

|                   |                                                                                                             |          |
|-------------------|-------------------------------------------------------------------------------------------------------------|----------|
| <b>Table S1</b>   | List of oligonucleotide and peptide sequences                                                               | Page S3  |
| <b>Scheme S1</b>  | Synthetic strategy for dehydroalanine-modified 15-mer peptide                                               | Page S3  |
| <b>Figure S1</b>  | HPLC purification of 15-mer dehydroalanine peptide                                                          | Page S4  |
| <b>Figure S2</b>  | LC-ESI-MS/MS analysis of dehydroalanine 15-mer peptide                                                      | Page S4  |
| <b>Figure S3</b>  | Extracted ion chromatogram and CID spectrum of $m/z$ 806.09 (+2) of 15-mer dehydroalanine peptide           | Page S5  |
| <b>Table S2</b>   | Observed and theoretical CID fragments of $m/z$ 806.09 for dehydroalanine modified peptide                  | Page S6  |
| <b>Scheme S2</b>  | Synthetic strategy for $N^6$ -cystamine-dA-modified oligonucleotide                                         | Page S6  |
| <b>Figure S4</b>  | HPLC purification of $N^6$ -cystamine-dA-modified oligonucleotide                                           | Page S7  |
| <b>Figure S5</b>  | MALDI spectrum of $N^6$ -cystamine-dA-modified oligonucleotide                                              | Page S8  |
| <b>Figure S6</b>  | Gel purification of $N^6$ -dA DNA-peptide crosslink                                                         | Page S8  |
| <b>Figure S7</b>  | ESI-MS characterization of $N^6$ -dA-peptide crosslink                                                      | Page S9  |
| <b>Figure S8</b>  | Flow chart for HF treatment                                                                                 | Page S9  |
| <b>Figure S9</b>  | LC-ESI-MS/MS analysis of HF treated $N^6$ -dA-peptide crosslink                                             | Page S10 |
| <b>Figure S10</b> | Extracted ion chromatogram and CID spectrum of $m/z$ 613.66 (-3) of HF treated $N^6$ -dA-peptide crosslink  | Page S10 |
| <b>Table S3</b>   | Observed and theoretical CID fragments of $m/z$ 613.66 of HF treated $N^6$ -dA-peptide crosslink            | Page S11 |
| <b>Figure S11</b> | Steady-state kinetic analysis of dATP, dCTP, and dGTP insertion by hPol $\eta$                              | Page S12 |
| <b>Figure S12</b> | PAGE of full-length extension reactions, UDG and piperidine treatment                                       | Page S13 |
| <b>Figure S13</b> | Extracted ion chromatogram and CID spectrum of $m/z$ 1048.64 (-3) for control template                      | Page S13 |
| <b>Table S4</b>   | Observed and theoretical CID fragments of $m/z$ 1048.64 (-3) for control template                           | Page S14 |
| <b>Figure S14</b> | Extracted ion chromatogram and CID spectrum of $m/z$ 1053.91 (-3) for control template                      | Page S15 |
| <b>Table S5</b>   | Observed and theoretical CID fragments of $m/z$ 1053.91 (-3) for control template                           | Page S16 |
| <b>Figure S15</b> | Extracted ion chromatogram $m/z$ 944.27 (-3) and observed peak $m/z$ 1048.68 (-3) for peptide-DNA crosslink | Page S17 |
| <b>Table S6</b>   | Observed and theoretical CID fragments of $m/z$ 944.27 (-3) for peptide-DNA crosslink                       | Page S17 |
| <b>Figure S16</b> | Extracted ion chromatogram and CID spectrum of $m/z$ 1048.64 (-3) for peptide-DNA crosslink                 | Page S18 |
| <b>Table S7</b>   | Observed and theoretical CID fragments of $m/z$ 1048.64 (-3) for peptide-DNA crosslink                      | Page S18 |
| <b>Figure S17</b> | Extracted ion chromatogram and CID spectrum of $m/z$ 1053.82 (-3) for peptide-DNA crosslink                 | Page S19 |
| <b>Table S8</b>   | Observed and theoretical CID fragments of $m/z$ 1053.82 (-3) peptide-DNA crosslink                          | Page S19 |

**Table S1****List of oligonucleotide and peptide sequences**

| Code                                                    | Oligonucleotide and peptide sequences                   | Calculated [M + H] <sup>+</sup> | Observed [M + H] <sup>+</sup> |
|---------------------------------------------------------|---------------------------------------------------------|---------------------------------|-------------------------------|
| 15-mer Peptide                                          | Acyl-PVPILIPCHR <sup>V</sup> VSSS-amide                 |                                 |                               |
| 15-mer Dehydroalanine (dha) peptide                     | Acyl-PVPILIP <sup>dha</sup> HRVSSS-amide                | 1610.93                         | 1611.00                       |
| N <sup>6</sup> -Cystamine-dA oligonucleotide            | 5'-TCTC <sup>X</sup> GTTTATGGACCACC-3'                  | 5878.0317                       | 5876.2090                     |
| 15-mer Peptide crosslinked to N <sup>6</sup> -dA in DNA | 5'-TCTC <sup>X</sup> GTTTATGGACCACC-3'<br>Oxidized form | 7443.8107                       | 7443.6817                     |
| 19-mer Template                                         | 5'-TCTCAGTTTATGGACCACC-3'                               |                                 |                               |
| 12-mer Primer                                           | 5'-FAM-GGTGGTCCATAA-3'                                  |                                 |                               |
| 14-mer Primer                                           | 5'-FAM-GGTGGTCCATAAAC-3'                                |                                 |                               |
| 12-mer Primer for LC-ESI-MS/MS                          | 5'-FAM-GGTGGTCCA <u>U</u> AA-3'                         |                                 |                               |

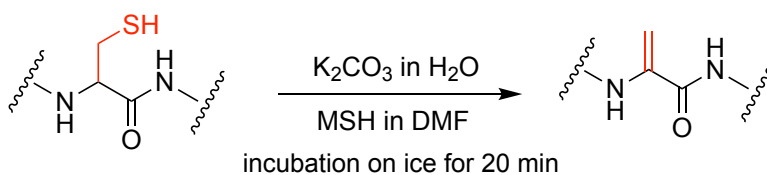**Scheme S1. Synthetic strategy for dehydroalanine 15-mer peptide**

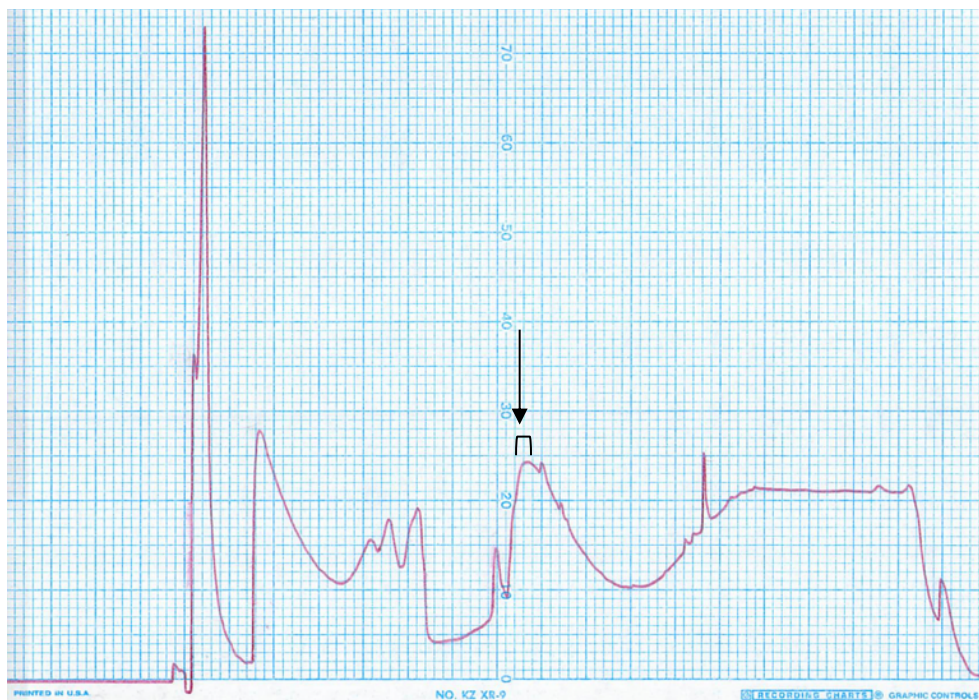

**Figure S1. HPLC purification of dehydroalanine 15-mer peptide.** The molecule of interest eluted at approximately 19.7 min.

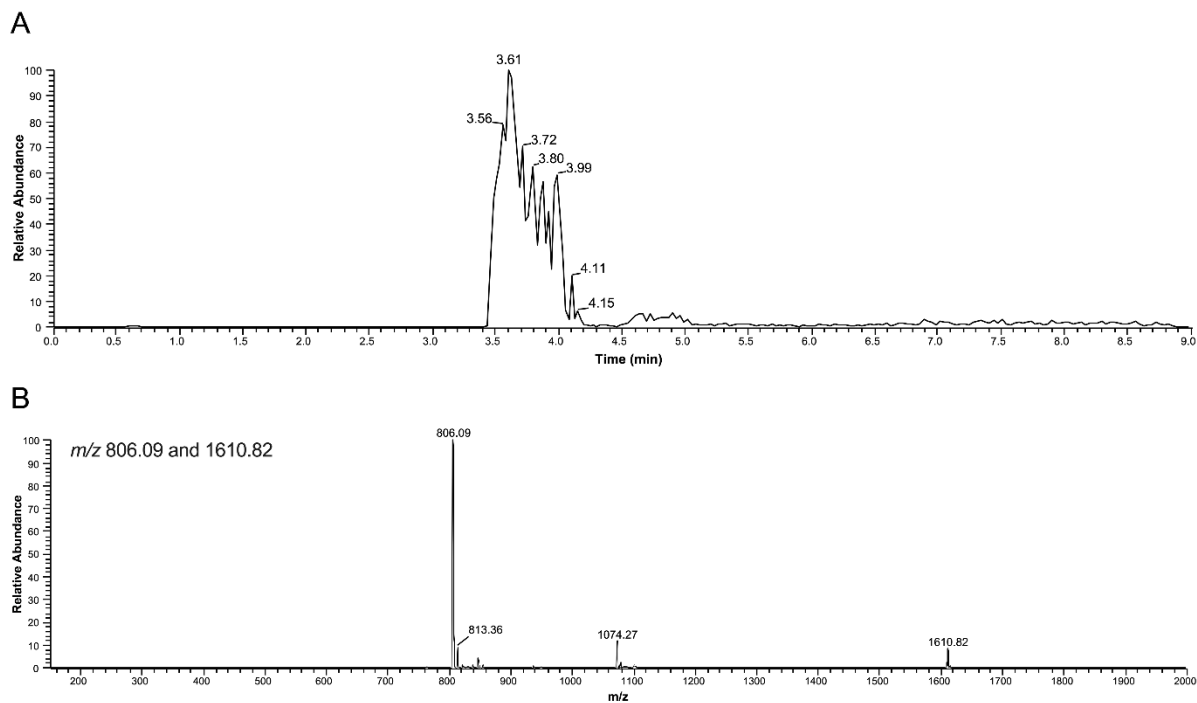

**Figure S2. LC-ESI-MS analysis of dehydroalanine 15-mer peptide.** *A*, total ion chromatogram.  $t_R$  3.61 min. *B*, observed peaks at  $m/z$  806.09 (+2) and 1610.82 (+1).

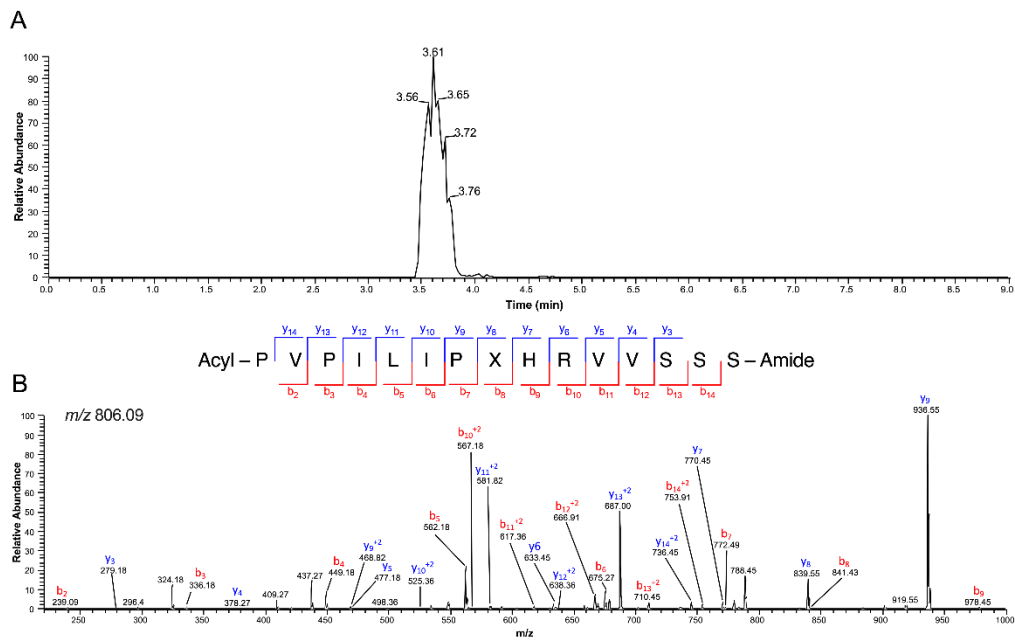

**Figure S3. LC-ESI-MS/MS analysis of synthesized dehydroalanine 15-mer peptide.** *A*, extracted ion chromatogram for *m/z* 806.09 (+2, *t<sub>R</sub>* 3.61 min). *B*, CID spectrum for *m/z* 806.09 (+2). See Table S2 for fragment assignment. *b*-ions represented in red color and *y*-ions represented in blue color. X, dehydroalanine.

**Table S2**

**Observed and theoretical CID fragments of  $m/z$  806.09 for dehydroalanine-modified peptide. X, dehydroalanine.**

| Fragment assignment                   | $m/z$ theoretical | $m/z$ observed |
|---------------------------------------|-------------------|----------------|
| Acyl-PV ( $b_2, +1$ )                 | 239.14            | 239.09         |
| Acyl-PVP ( $b_3, +1$ )                | 336.19            | 336.18         |
| Acyl-PVPI ( $b_4, +1$ )               | 449.28            | 449.18         |
| Acyl-PVPIL ( $b_5, +1$ )              | 562.36            | 562.18         |
| Acyl-PVPILIP ( $b_6, +1$ )            | 675.44            | 675.27         |
| Acyl-PVPILIPX ( $b_7, +1$ )           | 772.49            | 772.49         |
| Acyl-PVPILIPXH ( $b_8, +1$ )          | 841.43            | 841.43         |
| Acyl-PVPILIPXHR ( $b_9, +1$ )         | 978.49            | 978.45         |
| Acyl-PVPILIPXHRV ( $b_{10}, +2$ )     | 567.79            | 567.18         |
| Acyl-PVPILIPXHRVV ( $b_{11}, +2$ )    | 617.33            | 617.36         |
| Acyl-PVPILIPXHRVVVS ( $b_{12}, +2$ )  | 666.87            | 666.91         |
| Acyl-PVPILIPXHRVVSS ( $b_{13}, +2$ )  | 710.38            | 710.45         |
| Acyl-PVPILIPXHRVVSSS ( $b_{14}, +2$ ) | 753.89            | 753.91         |
| SSS-Amide ( $y_3, +1$ )               | 279.13            | 279.18         |
| VSSS-Amide ( $y_4, +1$ )              | 378.19            | 378.27         |
| VVSSS-Amide ( $y_5, +1$ )             | 477.27            | 477.18         |
| RVSSS-Amide ( $y_6, +1$ )             | 633.37            | 633.45         |
| HRVVSSS-Amide ( $y_7, +1$ )           | 770.43            | 770.45         |
| XHRVVSSS-Amide ( $y_8, +1$ )          | 839.36            | 839.55         |
| PXHRVVSSS-Amide ( $y_9, +1$ )         | 939.41            | 939.55         |
| IPXHRVVSSS-Amide ( $y_{10}, +2$ )     | 525.25            | 525.36         |
| LIPXHRVVSSS-Amide ( $y_{11}, +2$ )    | 581.79            | 581.82         |
| ILIPXHRVVSSS-Amide ( $y_{12}, +2$ )   | 638.34            | 638.36         |
| PILIPXHRVVSSS-Amide ( $y_{13}, +2$ )  | 686.86            | 687.00         |
| VPILIPXHRVVSSS-Amide ( $y_{14}, +2$ ) | 736.39            | 736.45         |

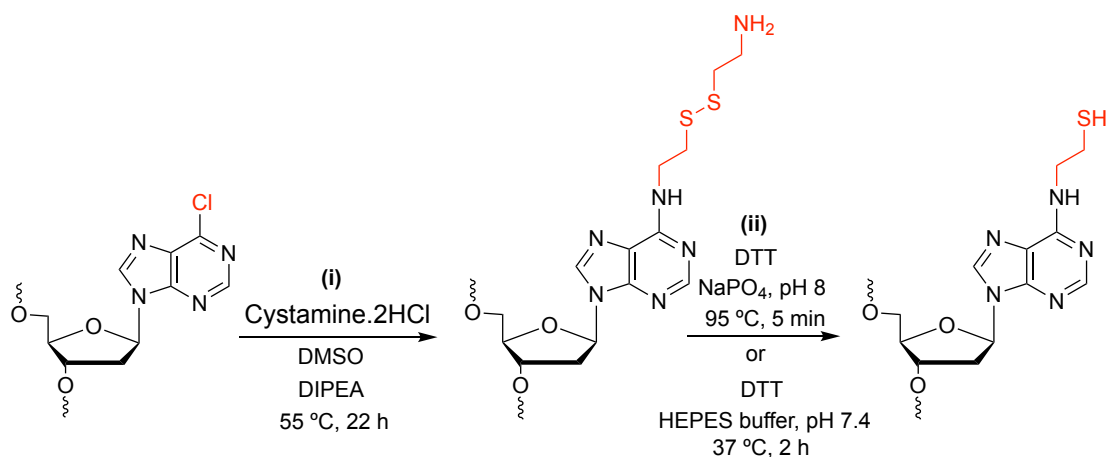

**Scheme S2. Synthetic strategy for  $N^6$ -cystamine-dA-modified oligonucleotide followed by reduction to obtain  $N^6$ -(2-thioethyl)-dA modified oligonucleotide.**

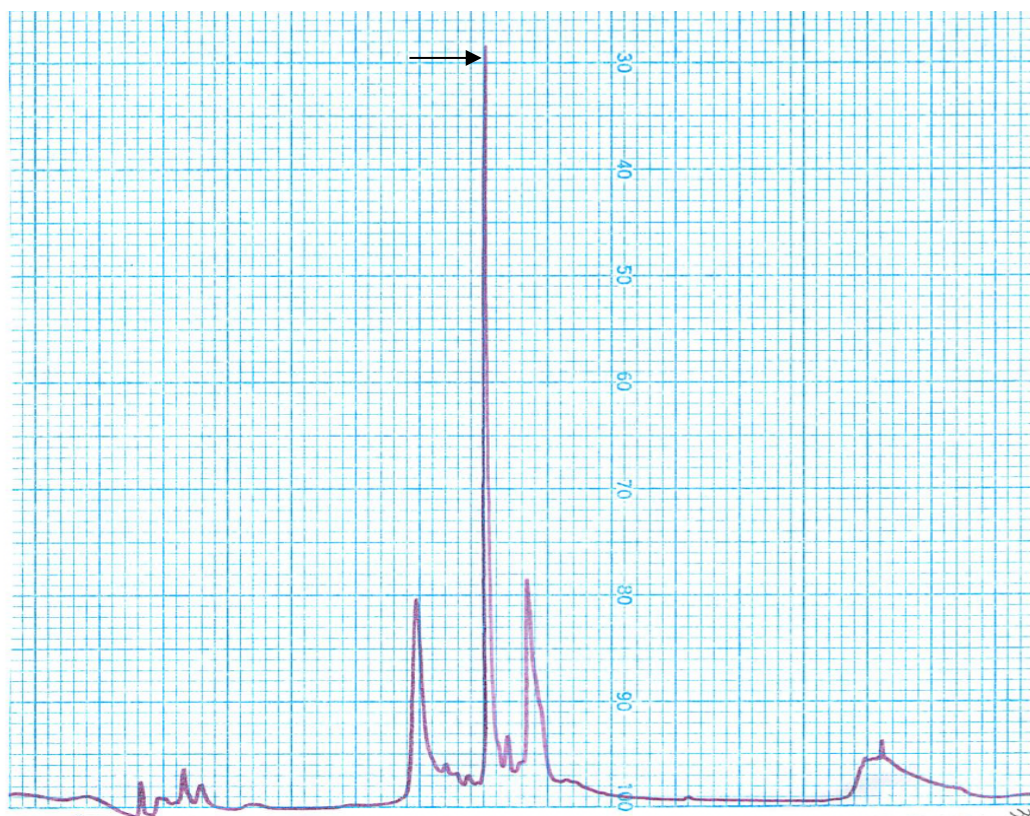

**Figure S4. HPLC purification of  $N^6$ -cystamine-dA-modified oligonucleotide.** The oligonucleotide of interest (shown with arrow) eluted at approximately 13.6 min (marked with arrow).

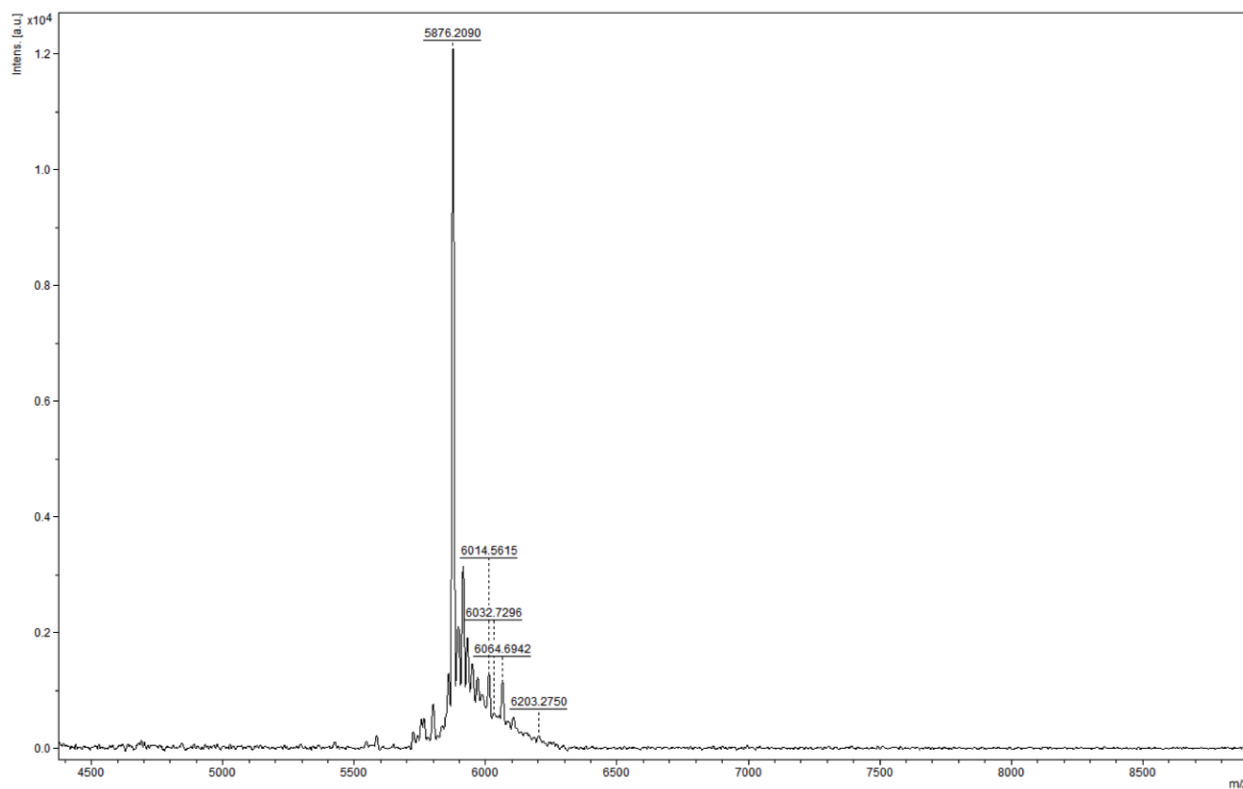

**Figure S5.** MALDI spectrum of  $N^6$ -cystamine-dA-modified oligonucleotide. Expected  $[M + H]^+$  5878.0317, mass  $[M + H]^+$  5876.2090.

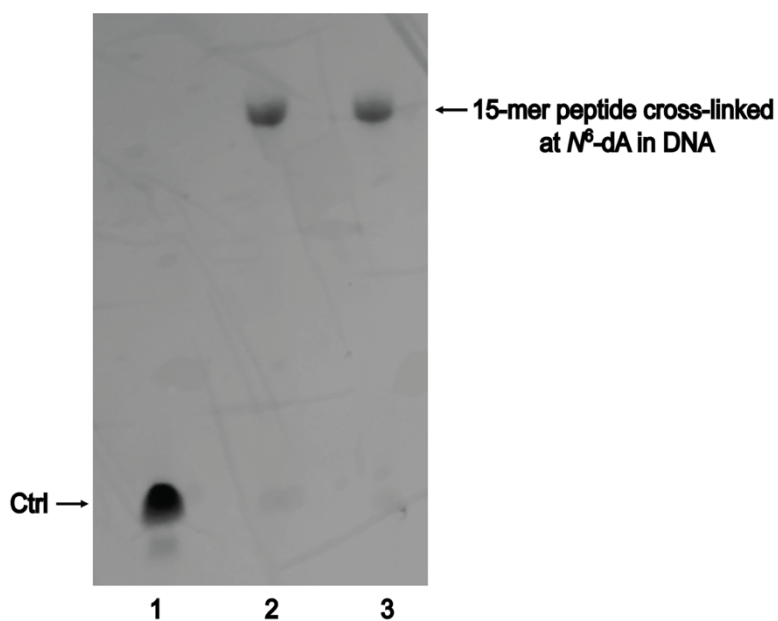

**Figure S6.** Gel purification (PAGE, 20%, 7 M urea) of  $N^6$ -dA-peptide crosslink. Lane 1: 19-mer DNA template. Lanes 2 and 3: Crosslinked reaction mixture.



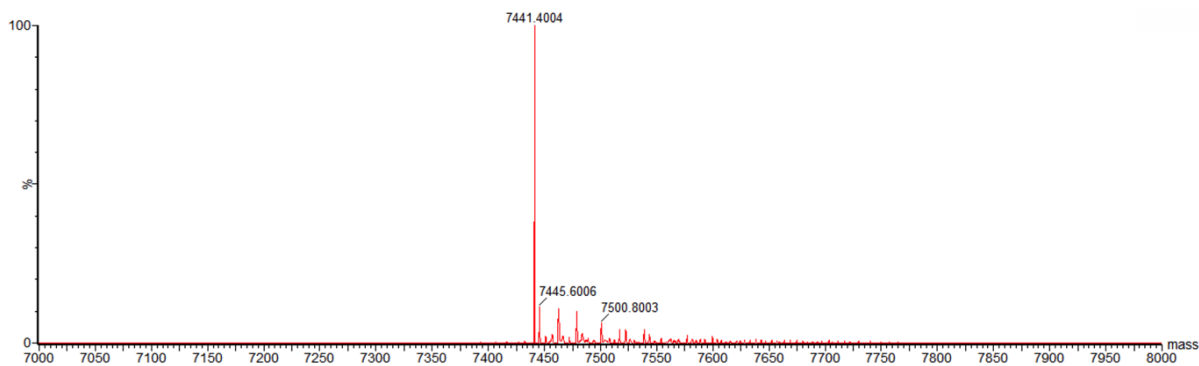

**Figure S7. ESI-MS characterization of 15-mer peptide crosslinked to  $N^6$ -dA.** Expected  $[M - H]^-$  7439.8107, observed  $[M - H]^-$  7441.4004.

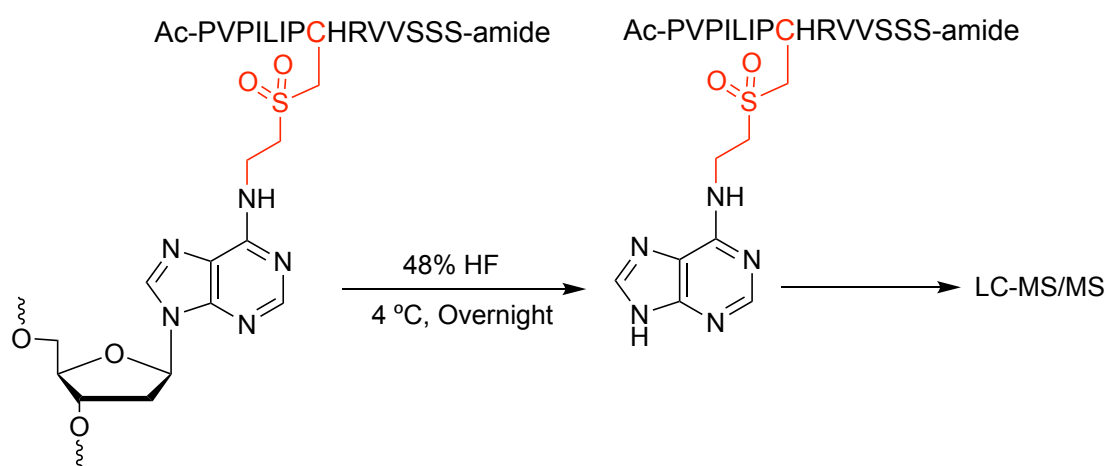

**Figure S8. Hydrolysis with HF.**

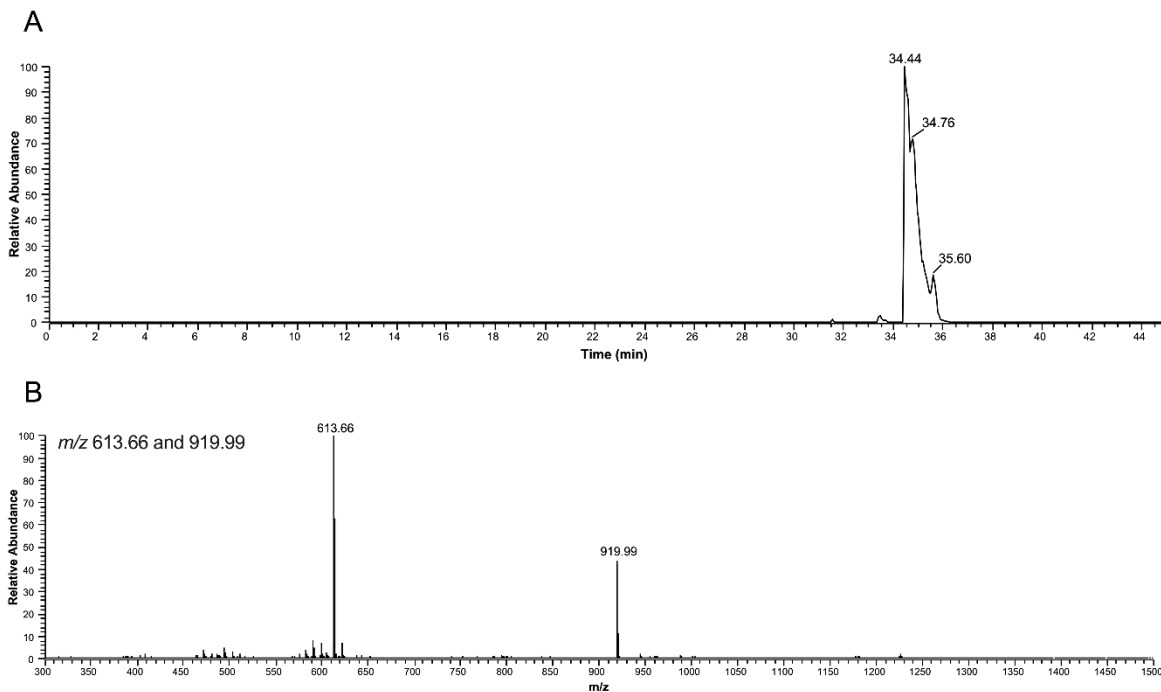

**Figure S9.** LC-ESI-MS/MS analysis of HF-treated 15-mer peptide crosslinked to  $N^6$ -dA. *A*, extracted ion chromatogram for  $m/z$  613.66 (+3,  $t_R$  34.44 min). *B*, observed peaks at  $m/z$  613.66 (+3) and 919.99 (+2).

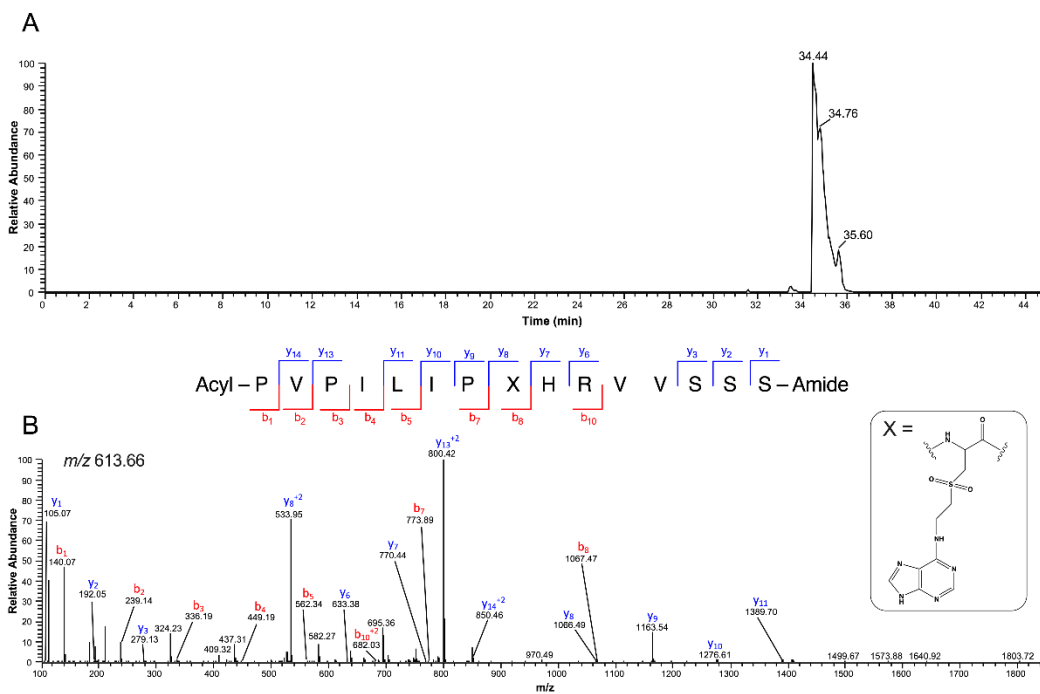

**Figure S10.** LC-ESI-MS/MS analysis of HF-treated 15-mer peptide crosslinked to  $N^6$ -dA. *A*, Extracted ion chromatogram for  $m/z$  613.66 (+3,  $t_R$  34.4 min), same as in Fig. S9A. *B*, CID spectrum for  $m/z$  613.66 (+3). See Table S3 for fragment assignments. b-ions represented in red color and y-ions represented in blue. X, cysteine link to A.

**Table S3****Observed and theoretical CID fragments of  $m/z$  613.66 for HF treated 15-mer peptide crosslinked to  $N^6$ -dA**

| Fragment assignment                         | $m/z$ theoretical | $m/z$ observed |
|---------------------------------------------|-------------------|----------------|
| Acyl-P (b <sub>1</sub> , +1)                | 140.07            | 140.07         |
| Acyl-PV (b <sub>2</sub> , +1)               | 239.14            | 239.14         |
| Acyl-PVP (b <sub>3</sub> , +1)              | 336.19            | 336.19         |
| Acyl-PVPI (b <sub>4</sub> , +1)             | 449.27            | 449.19         |
| Acyl-PVPIL (b <sub>5</sub> , +1)            | 562.36            | 562.34         |
| Acyl-PVPILIPX (b <sub>7</sub> , +1)         | 772.49            | 773.89         |
| Acyl-PVPILIPXH (b <sub>8</sub> , +1)        | 1068.68           | 1067.47        |
| Acyl-PVPILIPXHRV (b <sub>10</sub> , +2)     | 681.42            | 682.03         |
| S-Amide (y <sub>1</sub> , +1)               | 105.07            | 105.07         |
| SS-Amide (y <sub>2</sub> , +1)              | 192.09            | 192.05         |
| SSS-Amide (y <sub>3</sub> , +1)             | 279.13            | 279.13         |
| RVVSSS-Amide (y <sub>6</sub> , +1)          | 633.37            | 633.38         |
| HRVVSSS-Amide (y <sub>7</sub> , +1)         | 770.43            | 770.44         |
| XHRVVSSS-Amide (y <sub>8</sub> , +1)        | 1066.61           | 1066.49        |
| XHRVVSSS-Amide (y <sub>8</sub> , +2)        | 533.81            | 533.95         |
| PXHRVVSSS-Amide (y <sub>9</sub> , +1)       | 1163.66           | 1163.54        |
| IPXHRVVSSS-Amide (y <sub>10</sub> , +1)     | 1276.74           | 1276.61        |
| LIPXHRVVSSS-Amide (y <sub>11</sub> , +1)    | 1389.83           | 1389.70        |
| PILIPXHRVVSSS-Amide (y <sub>13</sub> , +2)  | 800.48            | 800.42         |
| VPILIPXHRVVSSS-Amide (y <sub>14</sub> , +2) | 850.02            | 850.46         |

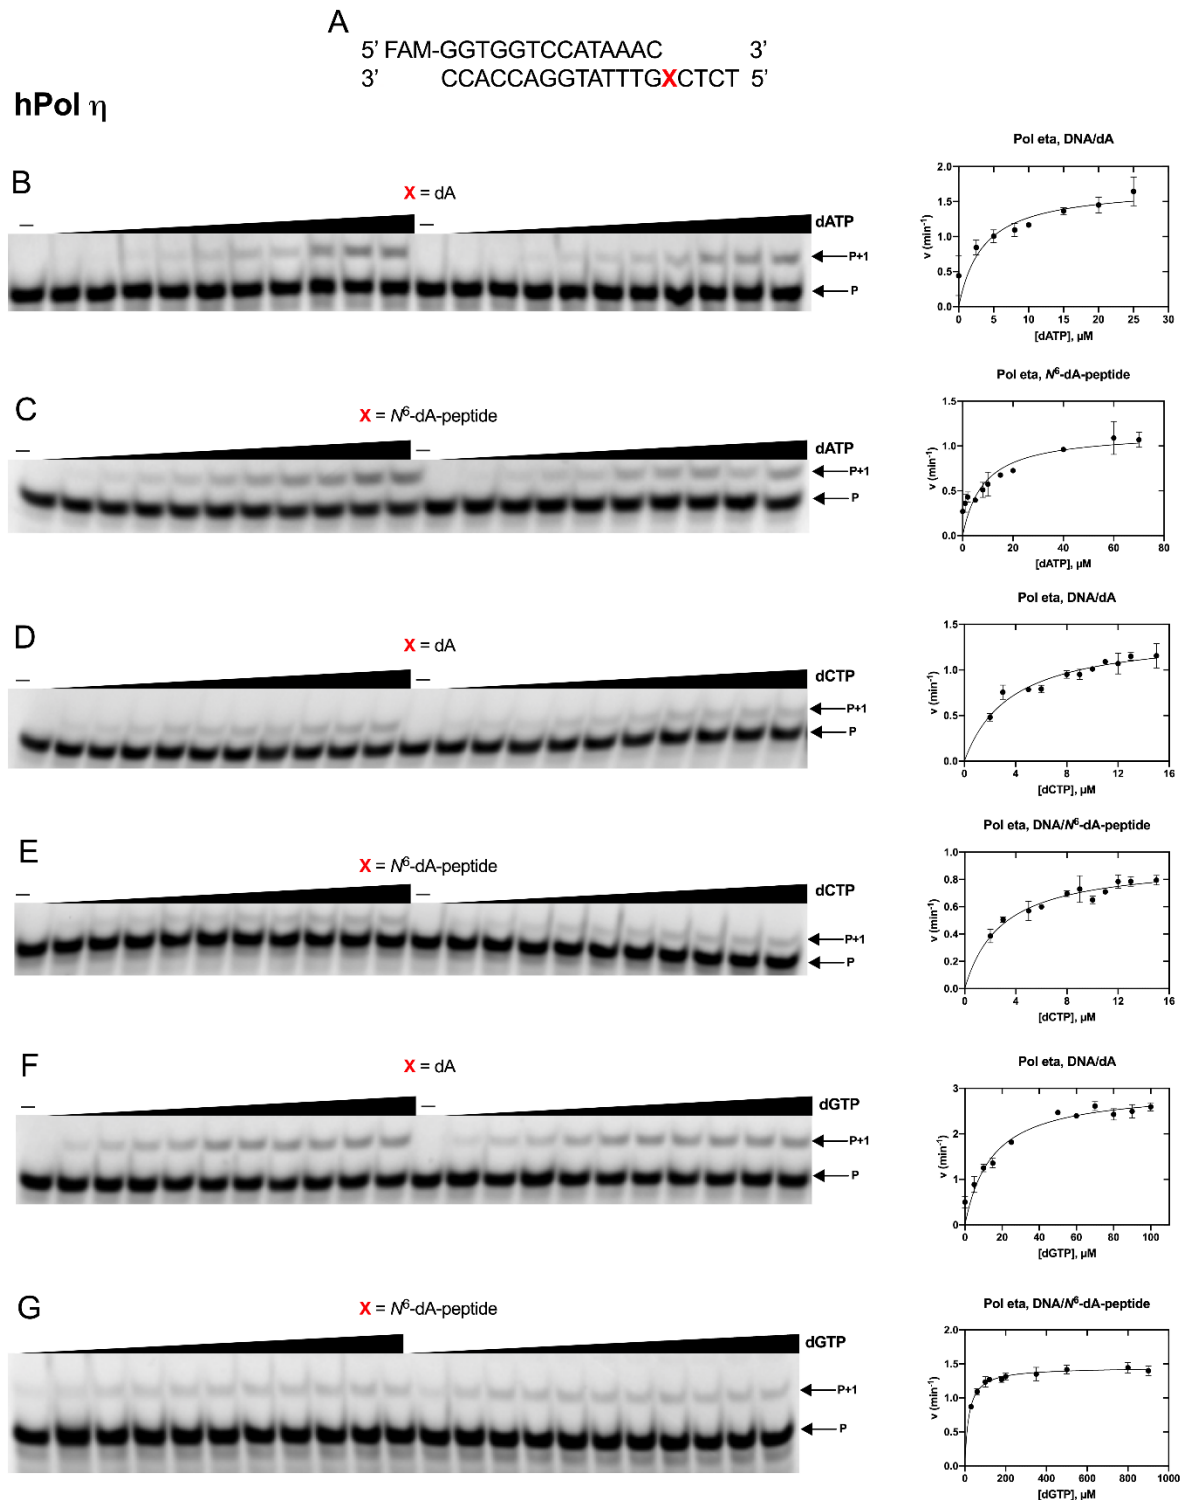

**Figure S11. Steady-state kinetic analysis of dATP, dCTP, and dGTP insertion by hPol  $\eta$ .** *A*, 14-mer primer and 19-mer template sequences, where **X** is dA or  $N^6$ -dA-peptide. Reactions were done at 37 °C using hPol  $\eta$  (2.5 nM (*C*, *E*), 2 nM (*B*, *D*), 1.5 nM (*G*), and 0.9 nM (*F*)). Varying concentrations of dATP (0-25  $\mu\text{M}$  (*B*) and 0-70  $\mu\text{M}$  (*C*)), dCTP (0-15  $\mu\text{M}$  (*D*, *E*)) and dGTP (0-100  $\mu\text{M}$  (*F*) and 30-900  $\mu\text{M}$  (*G*)). Reactions were carried out for 8 (*F*, *G*) and 10 (*B*, *C*, *D*, *E*) min.

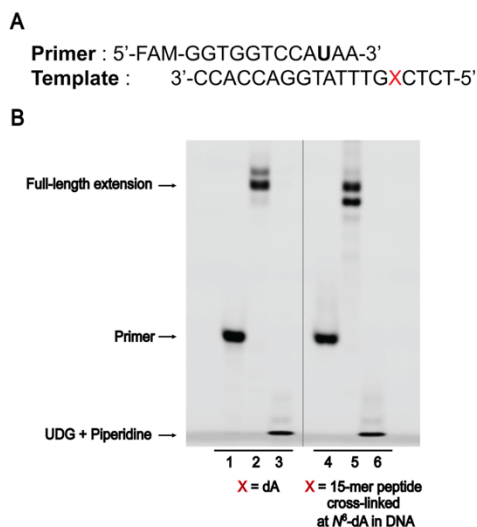

**Figure S12. PAGE (20%, 7 M urea) of full-length extension reactions employing hpol  $\eta$  (1.4  $\mu$ M) in the presence of a mixture of dNTPs. A, primer-template complex; B, full-length extension reactions for unmodified as well as cross-linked template-primer complex (Lane 1 and 4 included FAM-labeled dU containing 12-mer primer, Lane 2 and 5 included fully-extended products, and Lanes 3 and 6 included cleaved FAM-labeled primer after UDG and piperidine treatment. All reactions were carried out at 37 °C for 4 h.**

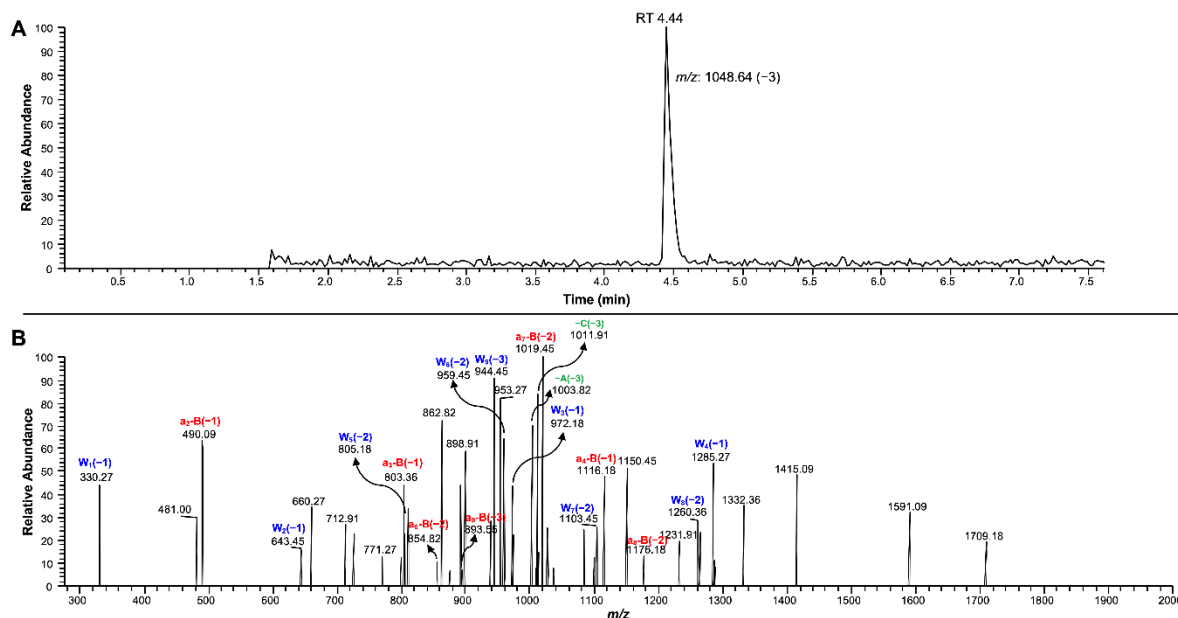

**Figure S13. LC-ESI-MS/MS sequencing analysis of full-length extension reactions for control DNA template by hPol  $\eta$  in the presence of dNTPs. A, extracted ion chromatogram for  $m/z$  1048.64 (-3,  $t_R$  4.44 min); B, CID spectrum of  $m/z$  1048.64 (-3). See Table S4 for fragment assignment. a-B fragments represented in red, W fragments in blue, and base losses in green.**

**Table S4****Observed and theoretical CID fragments of  $m/z$  1048.64 (-3) from full-length extended products for control DNA template**

The extended product sequence is 5'-pAAACTGAGAA-3' (Figure S13B), indicating insertion of T with blunt end addition of A.

| <b>Fragment assignment</b>            | <b><math>m/z</math> observed</b> | <b><math>m/z</math> theoretical</b> |
|---------------------------------------|----------------------------------|-------------------------------------|
| 5'-pAA (a <sub>2</sub> -B, -1)        | 490.09                           | 490.28                              |
| 5'-pAAA (a <sub>3</sub> -B, -1)       | 803.36                           | 803.49                              |
| 5'-pAAAC (a <sub>4</sub> -B, -1)      | 1116.18                          | 1116.70                             |
| 5'-pAAACTG (a <sub>6</sub> -B, -2)    | 854.82                           | 854.54                              |
| 5'-pAAACTGA (a <sub>7</sub> -B, -2)   | 1019.45                          | 1019.14                             |
| 5'-pAAACTGAG (a <sub>8</sub> -B, -2)  | 1176.18                          | 1175.75                             |
| 5'-pAAACTGAGA (a <sub>9</sub> -B, -3) | 893.55                           | 893.23                              |
| pAACTGAGAA-3' (W <sub>9</sub> , -3)   | 944.45                           | 944.28                              |
| pACTGAGAA-3' (W <sub>8</sub> , -2)    | 1260.36                          | 1260.32                             |
| pCTGAGAA-3' (W <sub>7</sub> , -2)     | 1103.45                          | 1103.71                             |
| pTGAGAA-3' (W <sub>6</sub> , -2)      | 959.45                           | 959.12                              |
| pGAGAA-3' (W <sub>5</sub> , -2)       | 805.18                           | 807.02                              |
| pAGAA-3' (W <sub>4</sub> , -1)        | 1285.27                          | 1285.84                             |
| pGAA-3' (W <sub>3</sub> , -1)         | 972.18                           | 972.63                              |
| pAA-3' (W <sub>2</sub> , -1)          | 643.45                           | 643.42                              |
| pA-3' (W <sub>1</sub> , -1)           | 330.27                           | 330.21                              |

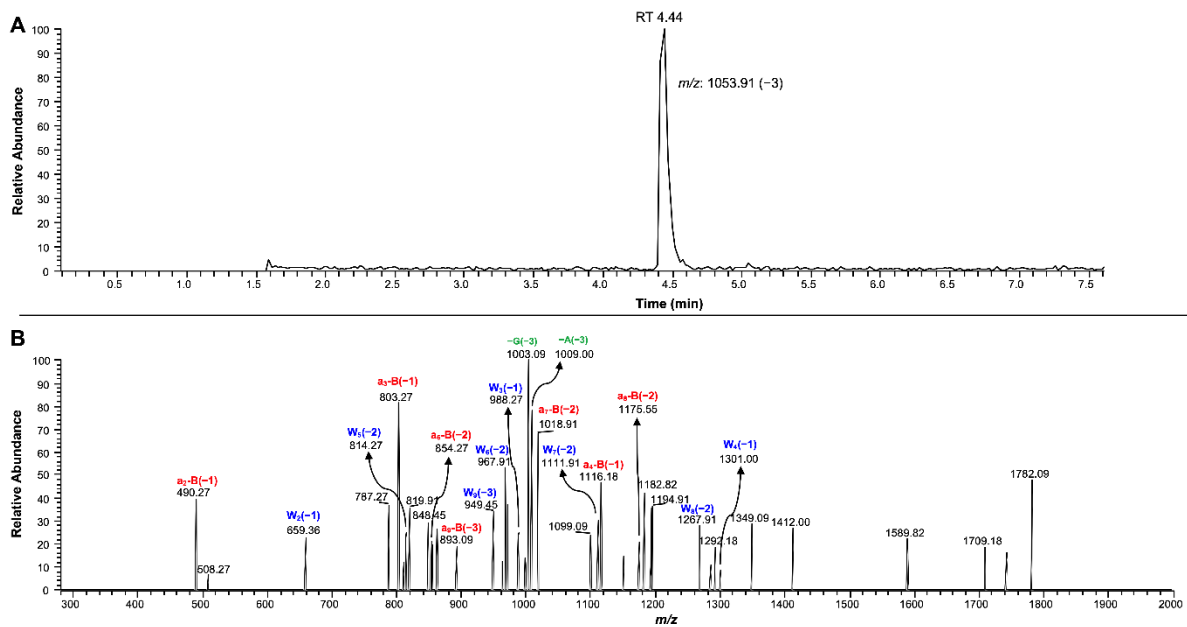

**Figure S14. LC-ESI-MS/MS sequencing analysis of full-length extension reactions for control DNA template by hpol  $\eta$  in the presence of dNTPs. A, extracted ion chromatogram for  $m/z$  1053.91 (-3,  $t_R$  4.44 min); B, CID spectrum of  $m/z$  1053.91 (-3). See Table S5 for fragment assignments.**

**Table S5****Observed and theoretical CID fragments of  $m/z$  1053.91 (-3) from full-length extended products for control DNA template**

The extended product sequence is 5'-pAAACTGAGAG-3' (Figure S14B), indicating insertion of T with blunt end addition of G.

| <b>Fragment assignment</b>            | <b><math>m/z</math> observed</b> | <b><math>m/z</math> theoretical</b> |
|---------------------------------------|----------------------------------|-------------------------------------|
| 5'-pAA (a <sub>2</sub> -B, -1)        | 490.27                           | 490.28                              |
| 5'-pAAA (a <sub>3</sub> -B, -1)       | 803.27                           | 803.49                              |
| 5'-pAAAC (a <sub>4</sub> -B, -1)      | 1116.18                          | 1116.70                             |
| 5'-pAAACTG (a <sub>6</sub> -B, -2)    | 854.27                           | 854.54                              |
| 5'-pAAACTGA (a <sub>7</sub> -B, -2)   | 1018.91                          | 1019.14                             |
| 5'-pAAACTGAG (a <sub>8</sub> -B, -2)  | 1175.55                          | 1175.75                             |
| 5'-pAAACTGAGA (a <sub>9</sub> -B, -3) | 893.09                           | 893.23                              |
| pAACTGAGAG-3' (W <sub>9</sub> , -3)   | 949.45                           | 949.61                              |
| pACTGAGAG-3' (W <sub>8</sub> , -2)    | 1267.91                          | 1268.32                             |
| pCTGAGAG-3' (W <sub>7</sub> , -2)     | 1111.91                          | 1111.71                             |
| pTGAGAG-3' (W <sub>6</sub> , -2)      | 967.91                           | 967.12                              |
| pGAGAG-3' (W <sub>5</sub> , -2)       | 814.27                           | 815.02                              |
| pAGAG-3' (W <sub>4</sub> , -1)        | 1301.00                          | 1301.84                             |
| pGAG-3' (W <sub>3</sub> , -1)         | 988.27                           | 988.63                              |
| pAG-3' (W <sub>2</sub> , -1)          | 659.36                           | 659.42                              |



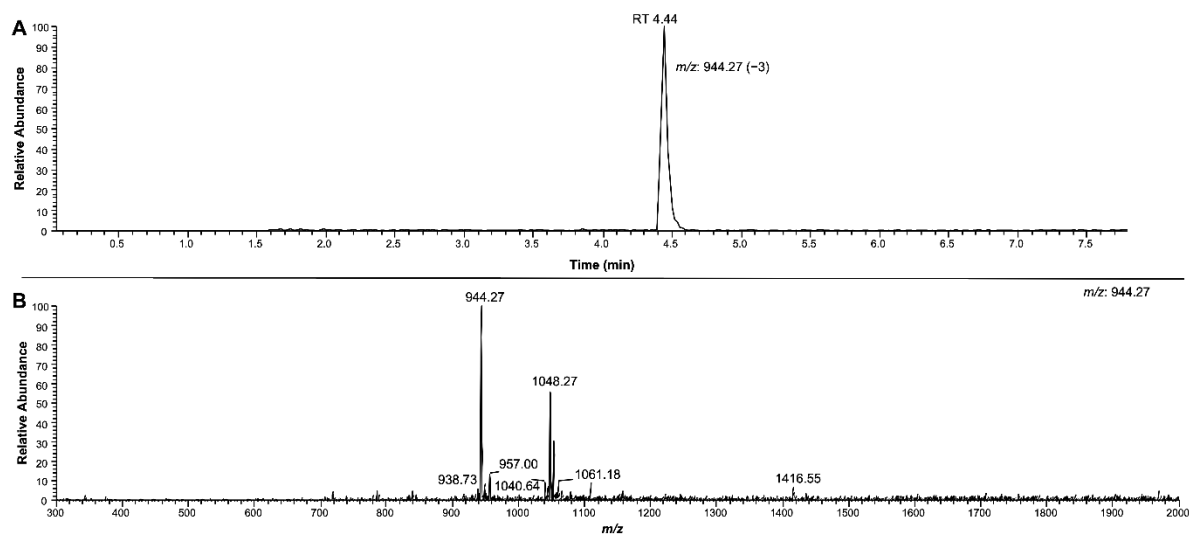

**Figure S15. LC-ESI-MS/MS sequencing analysis of full-length extension reactions for peptide-DNA crosslink by hPol  $\eta$  in the presence of dNTPs. *A*, extracted ion chromatogram for  $m/z$  944.27 ( $-3$ ,  $t_R$  4.44 min); *B*, another observed peak  $m/z$  1048.68 ( $-3$ ) eluting at the same  $t_R$ . See Table S6 for fragment assignments.**

**Table S6**

**Observed and theoretical CID fragments of  $m/z$  944.27 ( $-3$ ) from full-length extended products for peptide-DNA crosslink**

The extended product sequence is 5'-pAAACTGAGA-3' (Fig. 7), indicating the insertion of T.

| Fragment assignment                  | $m/z$ observed | $m/z$ theoretical |
|--------------------------------------|----------------|-------------------|
| 5'-pAA (a <sub>2</sub> -B, -1)       | 490.00         | 490.28            |
| 5'-pAAA (a <sub>3</sub> -B, -1)      | 803.18         | 803.49            |
| 5'-pAAAC (a <sub>4</sub> -B, -1)     | 1116.27        | 1116.70           |
| 5'-pAAACTG (a <sub>6</sub> -B, -2)   | 854.18         | 854.54            |
| 5'-pAAACTGA (a <sub>7</sub> -B, -2)  | 1019.36        | 1019.14           |
| 5'-pAAACTGAG (a <sub>8</sub> -B, -2) | 1175.45        | 1175.75           |
| pAACTGAGA-3' (W <sub>8</sub> , -3)   | 840.09         | 839.87            |
| pACTGAGA-3' (W <sub>7</sub> , -2)    | 1103.36        | 1103.71           |
| pTGAGA-3' (W <sub>5</sub> , -2)      | 802.27         | 802.51            |
| pGAGA-3' (W <sub>4</sub> , -2)       | 650.09         | 650.41            |
| pAGA-3' (W <sub>3</sub> , -1)        | 972.45         | 972.63            |
| pGA-3' (W <sub>2</sub> , -1)         | 659.18         | 659.42            |
| pA-3' (W <sub>1</sub> , -1)          | 330.09         | 330.21            |

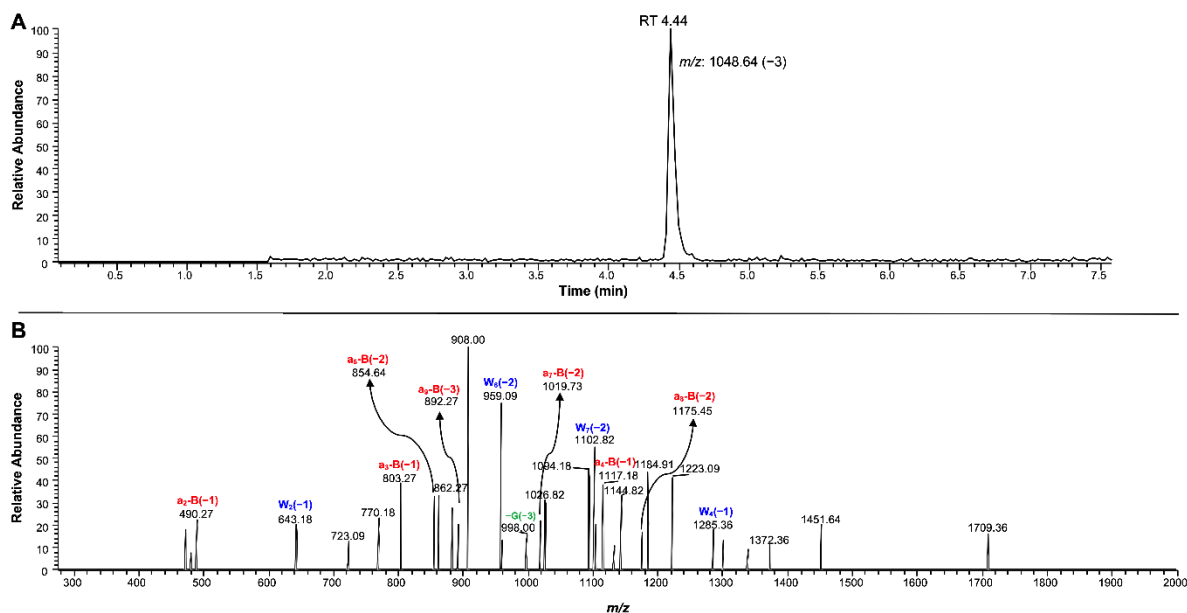

**Figure S16.** LC-ESI-MS/MS sequencing analysis of full-length extension reactions for peptide-DNA crosslink by hPol  $\eta$  in the presence of dNTPs. *A*, extracted ion chromatogram for  $m/z$  1048.64 ( $-3$ ,  $t_R$  4.44 min); *B*, CID spectrum of  $m/z$  1048.64 ( $-3$ ). See Table S7 for fragment assignments.

**Table S7**

**Observed and theoretical CID fragments of  $m/z$  1048.64 ( $-3$ ) from full-length extended products for peptide-DNA crosslink**

The extended product sequence is 5'-pAAACTGAGAA-3' (Figure S16B), indicating insertion of T with blunt end addition of A.

| Fragment assignment              | $m/z$ observed | $m/z$ theoretical |
|----------------------------------|----------------|-------------------|
| 5'-pAA ( $a_2$ -B, $-1$ )        | 490.27         | 490.28            |
| 5'-pAAA ( $a_3$ -B, $-1$ )       | 803.27         | 803.49            |
| 5'-pAAAC ( $a_4$ -B, $-1$ )      | 1117.18        | 1116.70           |
| 5'-pAAACTG ( $a_6$ -B, $-2$ )    | 854.64         | 854.54            |
| 5'-pAAACTGA ( $a_7$ -B, $-2$ )   | 1019.73        | 1019.14           |
| 5'-pAAACTGAG ( $a_8$ -B, $-2$ )  | 1175.45        | 1175.75           |
| 5'-pAAACTGAGA ( $a_9$ -B, $-3$ ) | 892.27         | 893.23            |
| pCTGAGAA-3' ( $W_7$ , $-2$ )     | 1102.82        | 1103.71           |
| pTGAGAA-3' ( $W_6$ , $-2$ )      | 959.09         | 959.12            |
| pAGAA-3' ( $W_4$ , $-1$ )        | 1285.36        | 1285.84           |
| pAA-3' ( $W_2$ , $-1$ )          | 643.18         | 643.42            |

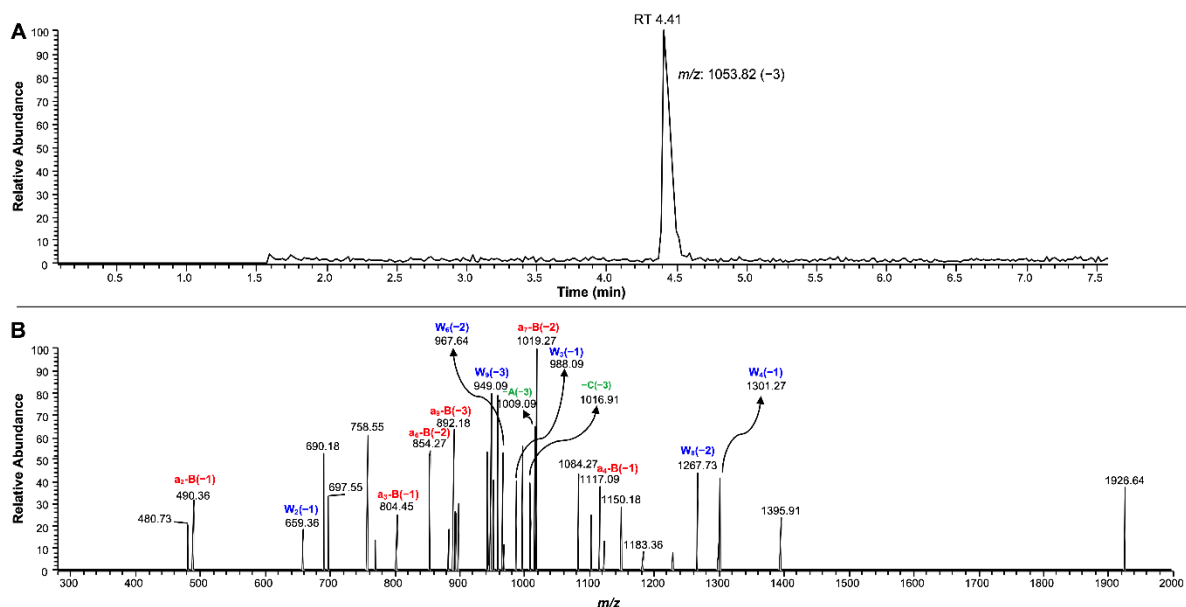

**Figure S17.** LC-ESI-MS/MS sequencing analysis of full-length extension reactions for peptide-DNA crosslink by hPol  $\eta$  in the presence of dNTPs. *A*, extracted ion chromatogram for  $m/z$  1053.82 ( $-3$ ,  $t_R$  4.41 min); *B*, CID spectrum of  $m/z$  1053.82 ( $-3$ ). See Table S8 for fragment assignment.

**Table S8**

**Observed and theoretical CID fragments of  $m/z$  1053.82 ( $-3$ ) from full-length extended products for peptide-DNA crosslink**

The extended product sequence is 5'-pAAACTGAGAG-3' (Figure S17B), indicating insertion of T with blunt end addition of G.

| Fragment assignment              | $m/z$ observed | $m/z$ theoretical |
|----------------------------------|----------------|-------------------|
| 5'-pAA ( $a_2$ -B, $-1$ )        | 490.36         | 490.28            |
| 5'-pAAA ( $a_3$ -B, $-1$ )       | 804.45         | 803.49            |
| 5'-pAAAC ( $a_4$ -B, $-1$ )      | 1117.09        | 1116.70           |
| 5'-pAAACTG ( $a_6$ -B, $-2$ )    | 854.27         | 854.54            |
| 5'-pAAACTGA ( $a_7$ -B, $-2$ )   | 1019.27        | 1019.14           |
| 5'-pAAACTGAGA ( $a_9$ -B, $-3$ ) | 892.18         | 893.23            |
| pAACTGAGAG-3' ( $W_9$ , $-3$ )   | 949.09         | 949.61            |
| pACTGAGAG-3' ( $W_8$ , $-2$ )    | 1267.73        | 1268.32           |
| pTGAGAG-3' ( $W_6$ , $-2$ )      | 967.64         | 967.12            |
| pAGAG-3' ( $W_4$ , $-1$ )        | 1301.27        | 1301.84           |
| pGAG-3' ( $W_3$ , $-1$ )         | 988.09         | 988.63            |
| pAG-3' ( $W_2$ , $-1$ )          | 659.36         | 659.42            |
